# Supplementary material for: Efficacy of multifocal spectacles for myopia control in pre-myopic children: a multicenter real-world study
Source: Research Square preprint supplement (doi:10.21203/rs.3.rs-7700875/v1), 2025-10-10
Supplement: Supplementary file 1 [file a6a79b943f5d06f05c690ac0.docx]

**Efficacy of Multifocal Spectacles for Myopia Control in Premyopic Children:**

**A Multicenter Real-World Study**

Supplement 1**. Changes in SE and AL Across MF Subtypes (DSDO/DIMS/HAL)**

| Factor | DSDO (95% CI) | DIMS (95% CI) | HAL (95% CI) | *P* all |
| --- | --- | --- | --- | --- |
| 12-mo follow-up subdataset | | | | |
| Number | 102 | 100 | 83 | - |
| Sex(female) | 52(51.0%) | 51(51.0%) | 43(51.8%) | 0.992 |
| Age(y) | 8.68±1.54(8.37-8.98) | 8.97±1.50(8.67-9.27) | 9.04±1.88(8.62-9.45) | 0.254 |
| Baseline SE（D） | -0.03±0.32(-0.10-0.03) | -0.16±0.25(-0.21- -0.11) | -0.20±0.24(-0.25- -0.14) | 0.001 |
| Baseline AL（mm） | 23.61±0.71(23.47-23.75) | 23.59±0.67(23.46-23.73) | 23.58±0.64(23.44-23.72) | 0.967 |
| △SE（D） | -0.29±0.36(-0.36- -0.22) | -0.30±0.32(-0.37- -0.24) | -0.21±0.32(-0.28--0.14) | 0.075 |
| △AL（mm） | 0.14±0.17(0.11-0.18) | 0.16±0.16(0.13-0.20) | 0.12±0.16(0.09-0.16) | 0.185 |

95% CI = 95% confidence interval; MF = multifocal **spectacles**; DIMS = Defocus Incorporated Multiple Segments ; DSDO = Diverse Segmented Defocus Optics; HAL = Highly Aspherical Lenslets. SE = spherical equivalent; AL = axial length; D = diopters.

Effect of Low-Concentration Atropine Eyedrops vs Placebo on Myopia Incidence in Children The LAMP2 Randomized Clinical Trial


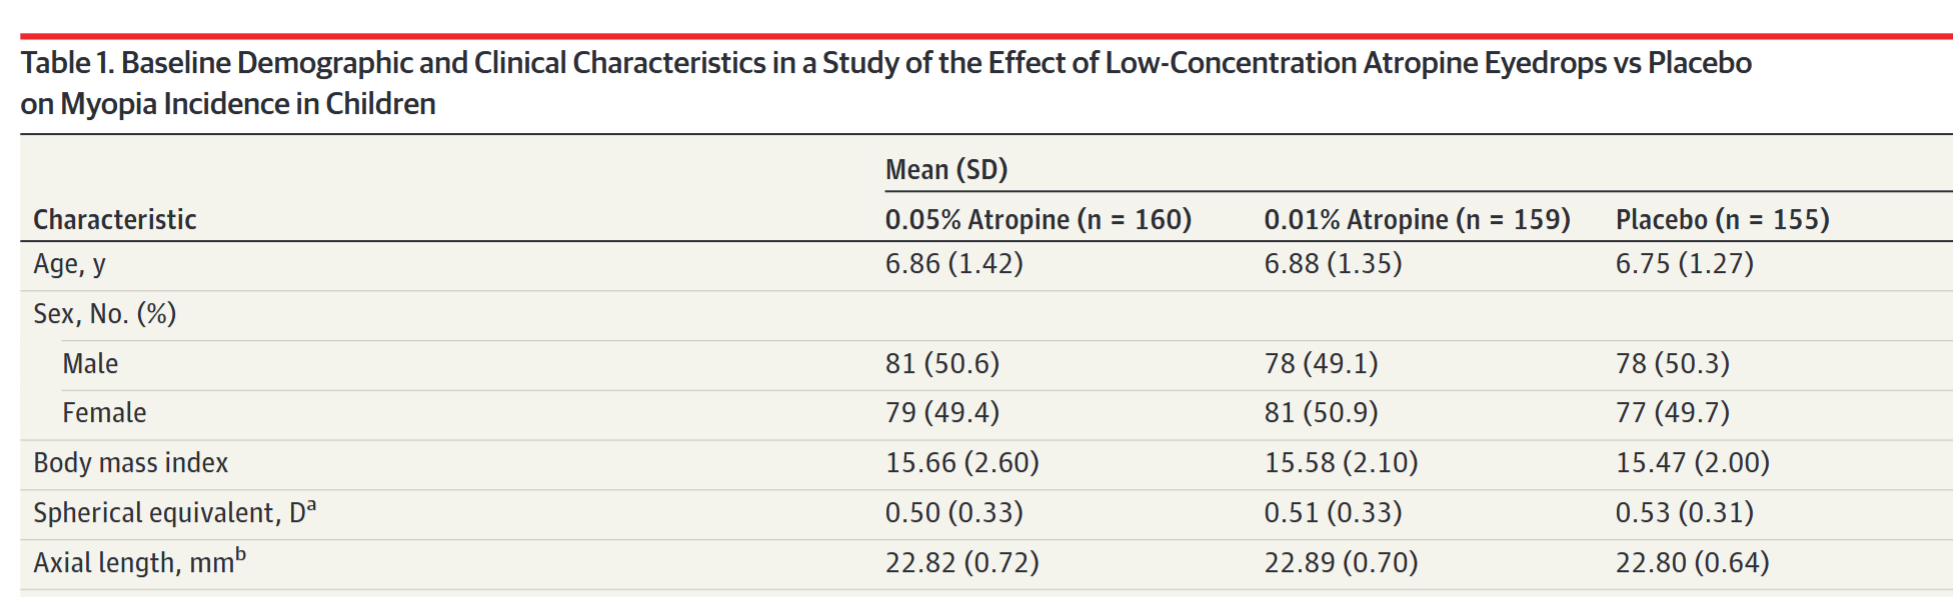


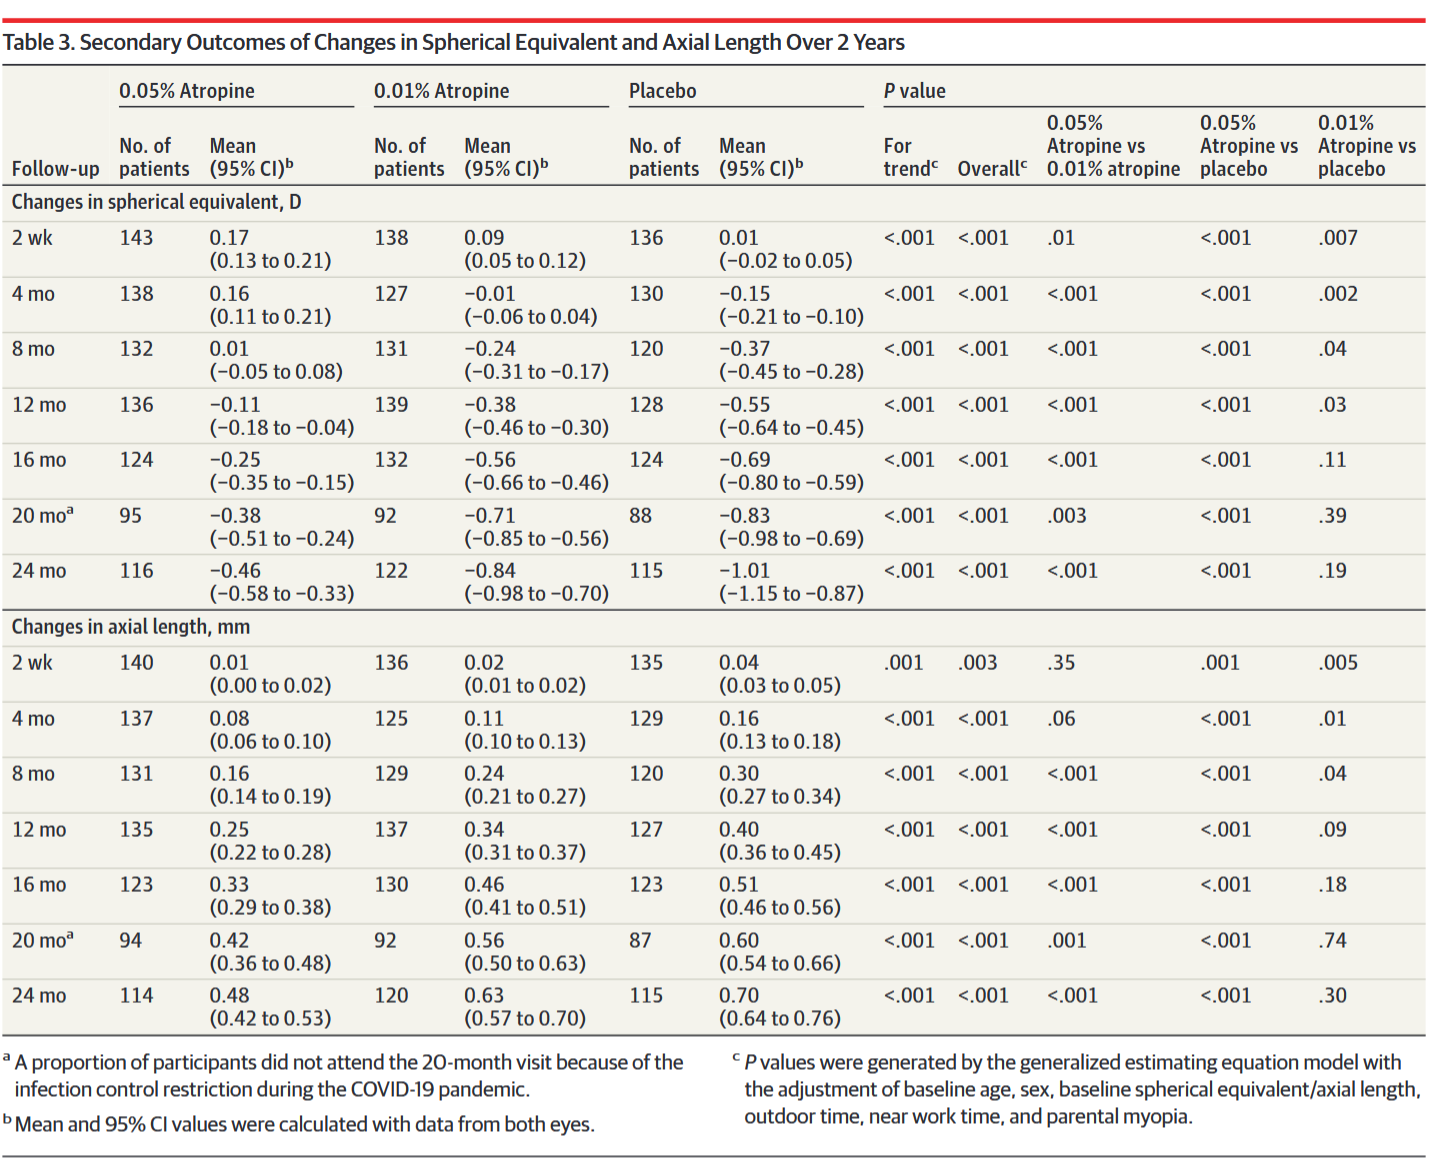


Supplement 1**.** The **Treatment Efficacy** of MF **spectacles** after matching for age with The LAMP2 randomized clinical trial

| Factor | MF (95%CI) | SV (95%CI) | *P* |
| --- | --- | --- | --- |
| 12-mo follow-up subdataset | | | |
| Number | **152** | 159 |  |
| Sex (female) | 72(47.4%) | 72(45.3%) | 0.712 |
| Age (y) | 6.82±0.94 (6.67-6.97) | 6.82±0.99 (6.66-6.97) | 0.867 |
| Baseline SE（D） | 0.04±0.36 (-0.01-0.10) | 0.07±0.39 (0.01-0.13) | 0.554 |
| Baseline AL（mm） | 23.22±0.65 (23.11-23.32) | 23.18±0.64 (23.08-23.28) | 0.539 |
| △SE（D） | -0.32±0.40 (-0.38--0.26) | -0.67±0.56 (-0.76--0.59) | ＜0.001 |
| △AL（mm） | 0.22±0.18 (0.19-0.25) | 0.41±0.23 (0.37-0.45) | ＜0.001 |

95% CI = 95% confidence interval; MF = multifocal **spectacles**; SV= single vision spectacle lenses;SE = spherical equivalent; AL = axial length; D = diopters

Supplement 1**.Treatment Efficacy of MF in Shenyang, Guangdong, and Chongqing Regions**

|  | MF | | | | SV | | | |
| --- | --- | --- | --- | --- | --- | --- | --- | --- |
| Factor | **Shenyang1 (**95% CI） | **Guangzhou2 (**95% CI**)** | **Chongqing3 (**95% CI**)** | *P* all | **Shenyang1 (**95% CI） | **Guangzhou2 (**95% CI**)** | **Chongqing3 (**95% CI**)** | *P* all |
| 12-mo follow-up subdataset | | | | | | | | |
| Number | 97 | 145 | 140 | - | 84 | 82 | 125 | - |
| Sex  (female) | 50(51.5%) | 67(46.2%) | 66(47.1%) | 0.699 | 37(44%) | 40(48.8%) | 70(56%) | 0.222 |
| Age(y) | 8.90±1.72  (8.55-9.24) | 8.84±1.78  (8.55-9.13) | 8.96±1.82  (8.65-9.26) | 0.706 | 7.93±1.97  (7.50-8.36) | 8.04±2.67  (7.45-8.62) | 7.97±2.04  (7.61-8.33) | 0.996 |
| Baseline  SE（D） | -0.14±0.20  (-0.18--0.10) | -0.07±0.31  (-0.12--0.02) | -0.11±0.34  (-0.17--0.50) | 0.198 | 0.15±0.35  (0.07-0.23) | 0.21±0.35  (0.13-0.29) | 0.18±0.29  (0.13-0.23) | 0.198 |
| Baseline  AL（mm） | 23.66±0.63  (23.53-23.79) | 23.58±0.59  (23.48-23.67) | 23.64±0.70  (23.52-23.75) | 0.601 | 23.11±0.80  (22.93-23.30) | 23.15±0.69  (23.00-23.30) | 23.13±0.71  (23.00-23.26) | 0.957 |
| △SE（D） | -0.30±0.34  (-0.37--0.23) | -0.32±0.37  (-0.38--0.25) | -0.27±0.34  (-0.33--0.22) | 0.816 | -0.54±0.50  (-0.65--0.43) | -0.53±0.51  (-0.64--0.42) | -0.62±0.51  (-0.71--0.53) | 0.326 |
| △AL（mm） | 0.18±0.16  (0.14-0.21) | 0.17±0.17  (0.14-0.20) | 0.14±0.15  (0.12-0.17) | 0.203 | 0.33±0.20  (0.29-0.38) | 0.34±0.20  (0.30-0.38) | 0.36±0.22  (0.32-0.40) | 0.597 |

**1.Northeastern China,2.** South China**,3. Southwestern Inland China ;**95% CI = 95% confidence interval; MF = multifocal **spectacles**; SV= single vision spectacle lenses;SE = spherical equivalent; AL = axial length; D = diopters
